# Supplementary material
Source: publisher figshare collection journal article supplement (https://frontiersin.figshare.com/ndownloader/files/12726437)
Supplement: Supplementary file [file 12726437]

## Supplementary Material

# Quantitative analysis of interaction between CADM1 and its binding cell-surface proteins using surface plasmon resonance imaging

Takeshi Ito, Yutaka Kasai, Yuki Kumagai, Daisuke Suzuki, Misaki Ochiai-Noguchi, Daisuke Irikura, Shiro Miyake, Yoshinori Murakami\*

\* **Correspondence:** Corresponding Author: ymurakam@ims.u-tokyo.ac.jp

## 1 Supplementary Figures and Tables

### 1.1 Supplementary Figures

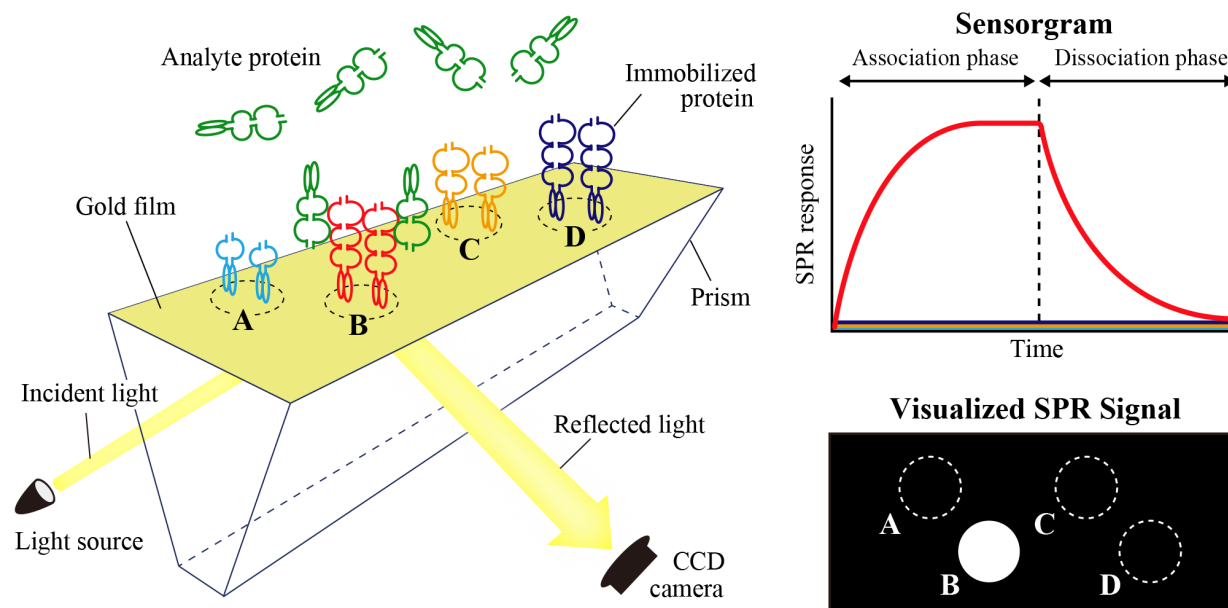

**Supplementary Figure 1. Experimental scheme of surface plasmon resonance imaging (SPRi)**

**analysis.** Proteins were spotted and immobilized on an SPR biochip consisting of a prism whose surface was coated with gold film. The binding of analyte protein to the immobilized protein was detected as a shift of SPR angle, which was recorded by a CCD camera. This resonance angle shifting was visualized as sensorgrams and bright spot images.

## 1.2 Supplementary Tables

**Supplementary Table 1. Concentration of the Fc-fusion proteins used for the surface plasmon resonance imaging analysis.**

| Protein     | Concentration (mg/mL) | Molecular weight (kDa) | Molar concentration ( $\mu$ M) |
|-------------|-----------------------|------------------------|--------------------------------|
| CADM1-Fc    | 0.9                   | 72                     | 13                             |
| CADM2-Fc    | 2                     | 85                     | 24                             |
| CADM3-Fc    | 0.8                   | 60                     | 13                             |
| CADM4-Fc    | 1.3                   | 75                     | 17                             |
| Nectin-1-Fc | 1.1                   | 75                     | 15                             |
| Nectin-2-Fc | 0.5                   | 70                     | 7                              |
| Nectin-3-Fc | 1.7                   | 100                    | 17                             |
| Nectin-4-Fc | 1.2                   | 68                     | 18                             |
| PVR-Fc      | 1.2                   | 80                     | 15                             |
| CRTAM-Fc    | 1.1                   | 75                     | 15                             |
